# Supplementary material for: Survival Prediction after Curative Resection of Pancreatic Ductal Adenocarcinoma by Imaging-Based Intratumoral Necrosis
Source: MDPI journal article supplement (doi:10.3390/cancers14225671), 2022-11-18

## Supplementary Material

### *Consistency of imaging necrosis between CT and MRI*

For the detection of imaging necrosis, 90 (88.2%) PDAC patients were determined to be consistent between CT and MRI as follows: 9 patients showed imaging necrosis on both CT and MRI, whereas 81 patients showed no imaging necrosis. All 9 patients with necrosis on both CT and MRI had histopathological necrosis, and the mean diameter of the PDACs was  $4.5 \pm 0.7$  cm.

Of the 12 (11.8%) PDAC patients with an inconsistency between CT and MRI, 7 patients showed MRI-detected necrosis but did not show CT-detected necrosis. Of the 7 patients, 6 had histopathological necrosis, and the mean diameter of the PDACs was  $3.1 \pm 1.0$  cm. Among the remaining 5 patients who showed CT-detected necrosis but no MRI-detected necrosis, histopathological necrosis was found in 3 patients. The mean diameter of the PDACs was  $4.0 \pm 1.1$  cm.

***Postoperative outcomes of PDAC with imaging necrosis according to CT contrast agent***

The DFS and OS rates tended to be poorer in patients with CT-detected necrosis using both CT contrast agents, although not statistically significant. In CT-Iobrix group, the mean DFS and OS of patients with CT-detected necrosis were 6.6 and 18.6 months, respectively, and those of patients without CT-detected necrosis were 14.6 and 34.2 months, respectively (DFS,  $P = 0.105$ ; OS,  $P = 0.082$ ). In CT-Ultravist group, the mean DFS and OS of patients with CT-detected necrosis were 16.9 and 37.1 months, respectively, and those of patients without CT-detected necrosis were 27.3 and 42.8 months, respectively (DFS,  $P = 0.140$ ; OS,  $P = 0.222$ ).

**Supplementary Table S1. MR sequence parameters.**

|                            | Sequence  |                  |         |         |         |
|----------------------------|-----------|------------------|---------|---------|---------|
|                            | 3D T1 GRE | Dual-echo T1 GRE | FSE T2  | HASTE   | DWI*    |
| Repetition time (ms)       | 3.5       | 5.5              | 3488    | 500     | 7800    |
| Echo time (ms)             | 1.2-1.4   | 1.3, OP; 2.6, IP | 120     | 90      | 75      |
| Flip angle (°)             | 15.5      | 9                | 140     | 150     | 90      |
| Matrix                     | 384×192   | 320×125          | 448×212 | 320×151 | 128×83  |
| Field of view (mm)         | 380×297   | 380×297          | 380×300 | 380×299 | 380×309 |
| Echo train length          | 1         | 1                | 29      | 256     | 1       |
| Section thickness (mm)     | 3         | 3                | 6       | 6       | 6       |
| No. of signal acquisitions | 1         | 1                | 2       | 1       | 4       |

Parallel imaging was performed using a k-space-based technique (CAIPIRINHA, Siemens Healthineers; SENSE, Philips Healthcare).

MR, magnetic resonance; 3D, three-dimensional; T1, T1-weighted; GRE, gradient-recalled echo; FSE, fast spin-echo; T2, T2-weighted; HASTE, half-Fourier acquisition single-shot turbo spin-echo; DWI, diffusion-weighted imaging; OP, out-of-phase; IP, in-phase.

\*Diffusion-weighted imaging was performed using a single-shot echo-planar imaging sequence with *b* values of 0 and 800 sec/mm<sup>2</sup>.

**Supplementary Table S2. Histopathologic findings of PDAC according to CT-detected necrosis.**

| Variable                                | Imaging necrosis on CT-Iobrix |             |          | Imaging necrosis on CT-Ultravist |             |          |
|-----------------------------------------|-------------------------------|-------------|----------|----------------------------------|-------------|----------|
|                                         | Yes (n = 7)                   | No (n = 56) | <i>P</i> | Yes (n = 7)                      | No (n = 32) | <i>P</i> |
| Histopathologic necrosis (mean ± SD), % | 20.0 ± 15.3                   | 6.3 ± 8.2   | <.001    | 17.1 ± 7.6                       | 5.2 ± 8.0   | .001     |
| Absence                                 | 2 (28.6)                      | 31 (55.4)   |          | 0 (0)                            | 20 (62.5)   |          |
| Presence                                | 5 (71.4)                      | 25 (44.6)   |          | 7 (100)                          | 12 (37.5)   |          |
| Tumor differentiation                   |                               |             | .004     |                                  |             | .445     |
| Well                                    | 0 (0)                         | 15 (26.8)   |          | 0 (0)                            | 5 (15.6)    |          |
| Moderate                                | 5 (71.4)                      | 40 (71.4)   |          | 6 (85.7)                         | 25 (78.1)   |          |
| Poor                                    | 2 (28.6)                      | 1 (1.8)     |          | 1 (14.3)                         | 2 (6.3)     |          |
| Lymphovascular invasion                 |                               |             | .407     |                                  |             | >.999    |
| Absence                                 | 1 (14.3)                      | 22 (39.3)   |          | 2 (28.6)                         | 11 (34.4)   |          |
| Presence                                | 6 (85.7)                      | 34 (60.7)   |          | 5 (71.4)                         | 21 (65.6)   |          |
| Perineural invasion                     |                               |             | .337     |                                  |             | >.999    |
| Absence                                 | 0 (0)                         | 11 (19.6)   |          | 0 (0)                            | 4 (12.5)    |          |
| Presence                                | 7 (100)                       | 45 (80.4)   |          | 7 (100)                          | 28 (87.5)   |          |
| Tumor cellularity                       |                               |             | .001     |                                  |             | >.999    |
| < 50%                                   | 0 (0)                         | 37 (66.1)   |          | 5 (71.4)                         | 23 (71.9)   |          |
| ≥ 50%                                   | 7 (100)                       | 19 (33.9)   |          | 2 (28.6)                         | 9 (28.1)    |          |
| Remaining acini                         |                               |             | .007     |                                  |             | .094     |
| Absence                                 | 5 (71.4)                      | 10 (17.9)   |          | 3 (42.9)                         | 4 (12.5)    |          |
| Presence                                | 2 (28.6)                      | 46 (82.1)   |          | 4 (57.1)                         | 28 (87.5)   |          |

|                       |          |           |          |           |      |
|-----------------------|----------|-----------|----------|-----------|------|
| Lymph node metastasis |          |           | .699     |           | .386 |
| Absence               | 3 (42.9) | 20 (35.7) | 1 (14.3) | 13 (40.6) |      |
| Presence              | 4 (57.1) | 36 (64.3) | 6 (85.7) | 19 (59.4) |      |

---

Values are presented as the number (%) of patients unless indicated otherwise.

PDAC, pancreatic ductal adenocarcinoma; CT, computed tomography; SD, standard deviation.

**Supplementary Table S3. Interreader agreement for imaging analysis.**

| Imaging feature                              | Reviewer 1                   | Reviewer 2                   | Proportion of agreement (%) | Kappa value (95% confidence interval) |
|----------------------------------------------|------------------------------|------------------------------|-----------------------------|---------------------------------------|
| CT-detected necrosis                         | 15                           | 11                           | 90/102 (88.2)               | 0.76 (0.64, 0.89)                     |
| MRI-detected necrosis                        | 17                           | 15                           | 92/102 (90.2)               | 0.80 (0.69, 0.92)                     |
| Contact to SMV or PV                         | 43                           | 37                           | 76/102 (74.5)               | 0.49 (0.32, 0.66)                     |
| Unenhanced T1WI hypointensity                | 97                           | 93                           | 90/102 (88.2)               | 0.76 (0.64, 0.89)                     |
| Pancreatic phase hypointensity               | 94                           | 92                           | 88/102 (86.3)               | 0.73 (0.59, 0.86)                     |
| Portal venous phase hypointensity            | 84                           | 86                           | 84/102 (82.4)               | 0.65 (0.50, 0.80)                     |
| Delayed phase hypointensity                  | 70                           | 69                           | 83/102 (81.4)               | 0.63 (0.48, 0.78)                     |
| Diffusion restriction                        | 89                           | 80                           | 87/100* (87.0)              | 0.74 (0.61, 0.87)                     |
| ADC ( $\times 10^{-3}$ mm <sup>2</sup> /sec) | 1.37 $\pm$ 0.38 <sup>†</sup> | 1.36 $\pm$ 0.41 <sup>†</sup> | NA                          | 0.89 (0.83, 0.92) <sup>‡</sup>        |
| Rim enhancement on MRI                       | 50                           | 20                           | 70/102 (68.6)               | 0.37 (0.19, 0.55)                     |

Data represent the number of patients with imaging features.

CT, computed tomography; MRI, magnetic resonance imaging; SMV, superior mesenteric vein; PV, portal vein; T1WI, T1-weighted imaging; ADC, apparent diffusion coefficient; NA, not applicable; PDAC, pancreatic ductal adenocarcinoma.

\*Diffusion-weighted imaging was unavailable for two patients.

<sup>†</sup>Data are expressed as the mean  $\pm$  standard deviation.

<sup>‡</sup>Agreement was evaluated using the intraclass correlation coefficient, with its 95% confidence interval in parentheses.

**Supplementary Figure S1.** Pancreatic ductal adenocarcinoma in the head of the pancreas in a 71-year-old woman. (a) An axial contrast-enhanced CT image shows a 4.3-cm hypoenhancing pancreatic head mass (arrowheads) without CT detection of necrosis. (b) An axial T2-weighted MR image with fat suppression shows a pancreatic head mass (arrowheads) accompanied by an intratumoral fluid-containing area at the central location (arrow). On axial dynamic contrast-enhanced T1-weighted MR images, (c) portal-venous and (d) delayed phases show a hypoenhancing pancreatic head mass (arrowheads) with nonenhanced intratumoral tissue judged as MRI-detected necrosis (arrow). (e, f) Micrograph shows gland-forming carcinoma cells in the periphery (black arrowheads) and necrosis (asterisks) in the central area of the tumor (hematoxylin and eosin stain,  $\times 12.5$  (e) and  $\times 200$  (f)). In this patient, imaging necrosis on CT and MRI was judged to be inconsistent, but histopathologically, approximately 30% of tumors consisted of necrosis. Distant lymph node metastasis was found on CT 3 months after margin-negative resection (not shown), and the patient died 2 years later.

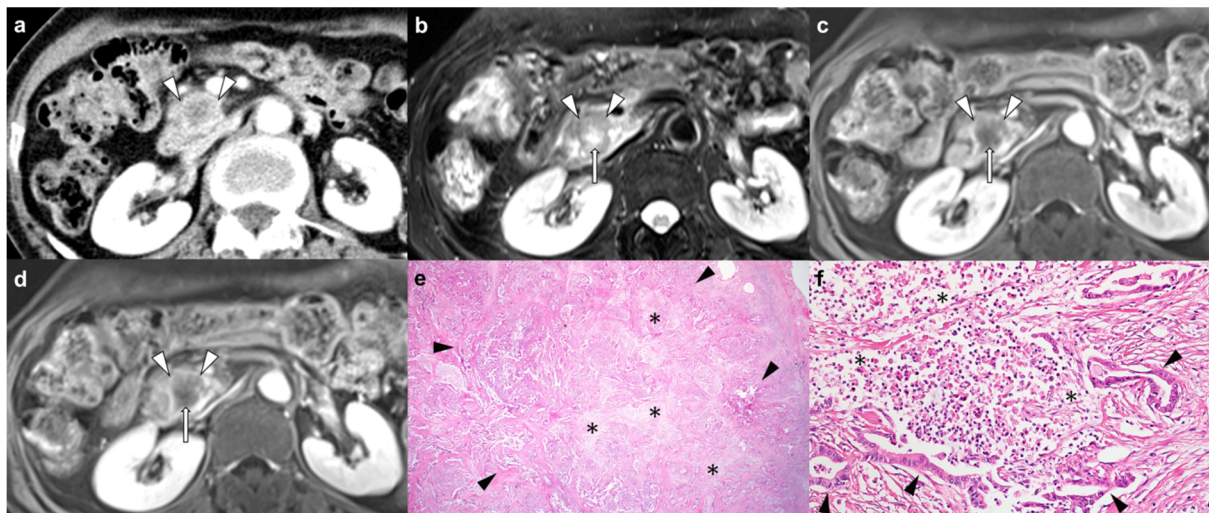

Supplement: s1 [file s1]
